# Supplementary material
Source: publisher figshare collection journal article supplement (https://karger.figshare.com/ndownloader/files/30937558)
Supplement: Supplementary file 1 [file 30937558]

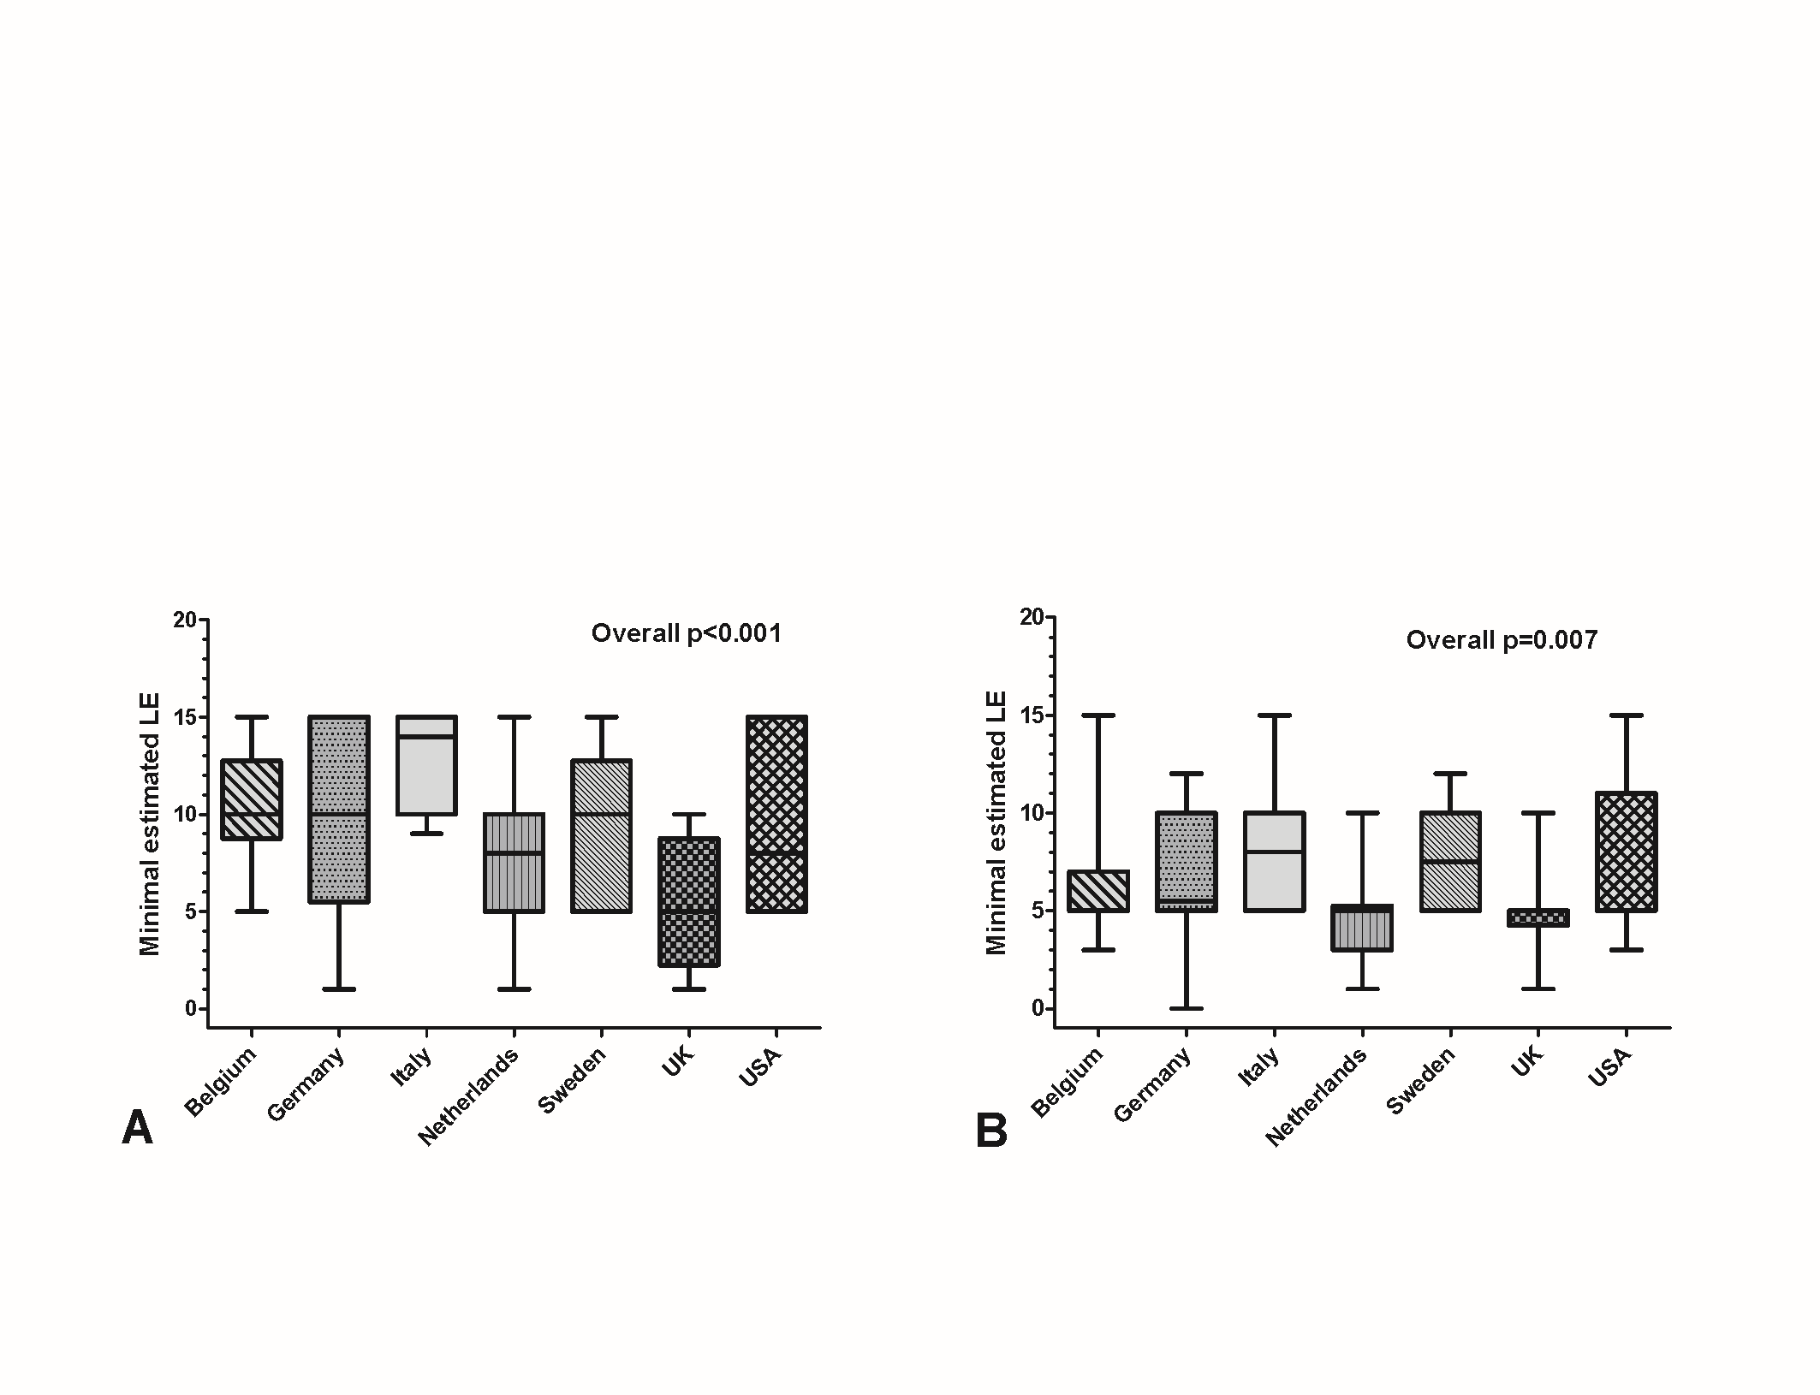


**Figure S3.** Minimal expected life expectancy to be eligible for a deceased/living donor kidney transplantation according to our respondents, stratified according to respondent country in case of **A.** a living donor **B.** a deceased donor

Only countries were included if at least 10 respondents per country were available.
